# Supplementary material for: Pathologic heterogeneity of lung adenocarcinomas: A novel pathologic index predicts survival
Source: PubMed Central journal article supplement (PMC5342557; doi:10.18632/oncotarget.11857), 2016-09-06
Supplement: oncotarget-07-70353-s001.pdf [file oncotarget-07-70353-s001.pdf]

# Pathologic heterogeneity of lung adenocarcinomas: A novel pathologic index predicts survival

## SUPPLEMENTARY FIGURES AND TABLES

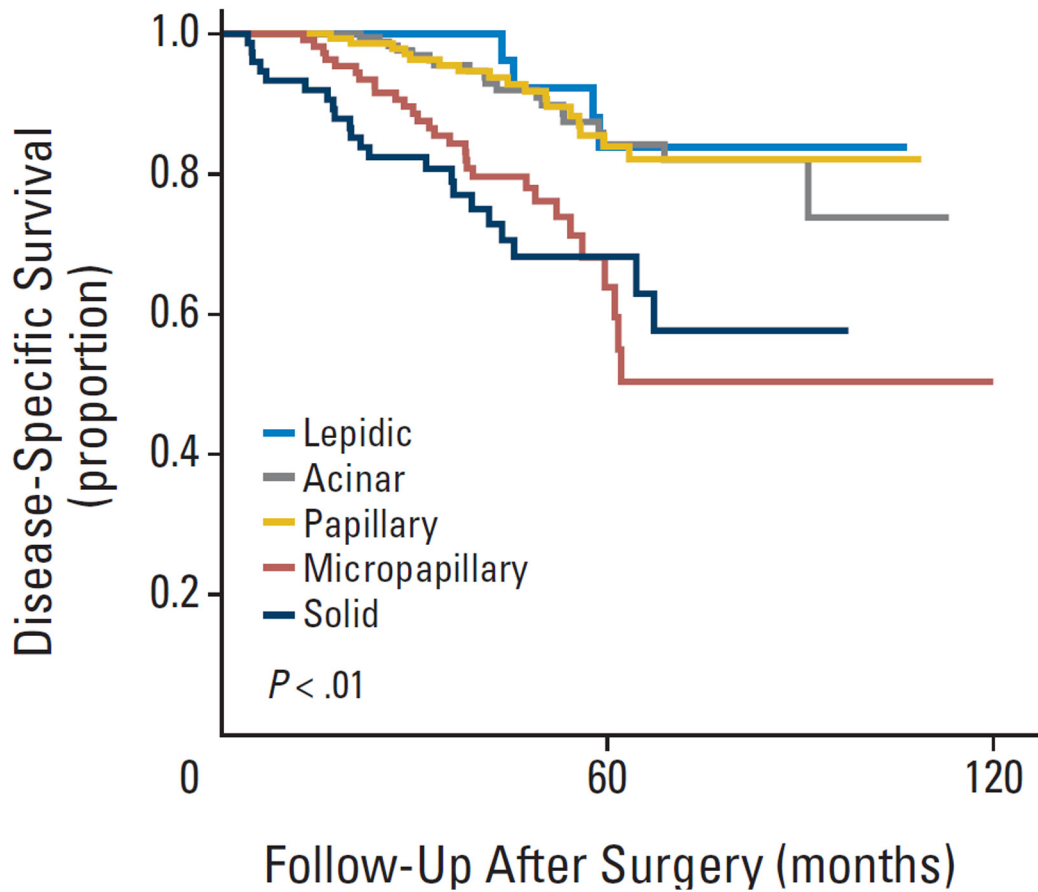

Supplementary Figure S1: Disease-specific survival curve according to all histologic predominant patterns from a previous publication by Hung et al [9].

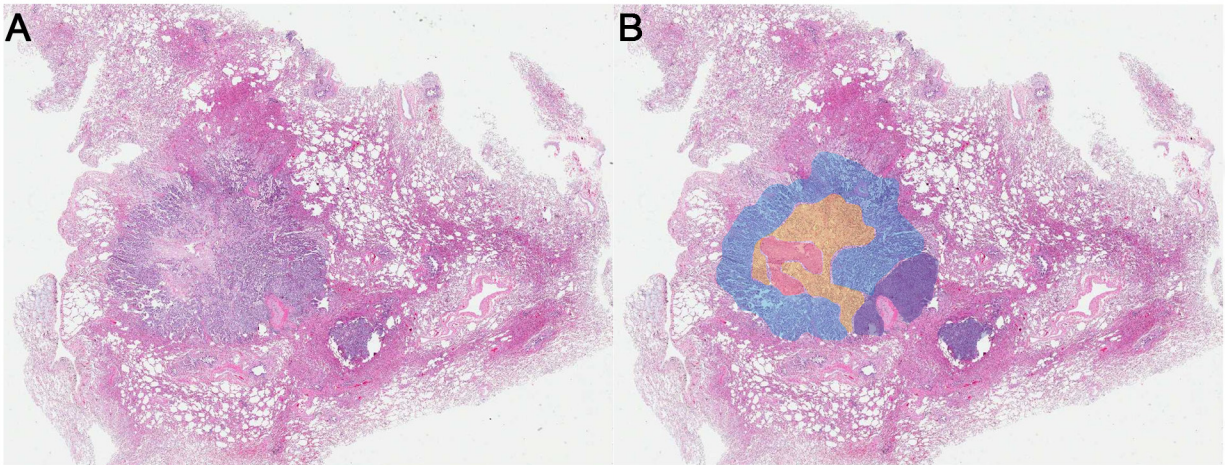

**Supplementary Figure S2: Microphotograph demonstrates an example of comprehensive semiquantitative histologic subtyping with elimination of the scar tissue in the validation cohort. A.** Photomicrograph shows central scar tissue with surrounding areas of tumor cells (hematoxylin-eosin stain). **B.** Schema of tumor cells shows the various components of central scar tissue (red), acinar (yellow), papillary (blue), and solid (purple) subtypes.

Supplementary Table S1: Clinical and pathologic characteristics of the development cohort

| Characteristic                              | No. of Patients (N=573) | %    |
|---------------------------------------------|-------------------------|------|
| <b>Age (mean ± SD) (y)</b>                  | 63.8 ± 11.6             |      |
| <b>Sex</b>                                  |                         |      |
| Male                                        | 305                     | 53.2 |
| Female                                      | 268                     | 46.8 |
| <b>Tumor size (mean ± SD) (mm)</b>          | 28 ± 14                 |      |
| <b>Pathologic stage</b>                     |                         |      |
| Ia                                          | 142                     | 24.8 |
| Ib                                          | 232                     | 40.5 |
| IIa                                         | 57                      | 9.9  |
| IIb                                         | 24                      | 4.2  |
| IIIa                                        | 111                     | 19.4 |
| IIIb                                        | 7                       | 1.2  |
| <b>T Status</b>                             |                         |      |
| pT1                                         | 166                     | 29.0 |
| pT2                                         | 349                     | 60.9 |
| pT3                                         | 38                      | 6.6  |
| pT4                                         | 20                      | 3.5  |
| <b>N Status</b>                             |                         |      |
| pN0                                         | 413                     | 72.1 |
| pN1                                         | 60                      | 10.5 |
| pN2                                         | 100                     | 17.4 |
| <b>Predominant subtype</b>                  |                         |      |
| Lepidic                                     | 35                      | 6.1  |
| Acinar                                      | 193                     | 33.7 |
| Papillary                                   | 155                     | 27.1 |
| Micropapillary                              | 112                     | 19.5 |
| Solid                                       | 78                      | 13.6 |
| <b>No. of subtypes comprising the tumor</b> |                         |      |
| 1                                           | 66                      | 11.5 |
| 2                                           | 251                     | 43.8 |
| 3                                           | 205                     | 35.8 |
| 4                                           | 47                      | 8.2  |
| 5                                           | 4                       | 0.7  |

SD = Standard deviation

**Supplementary Table S2: Number of patterns in each tertile group according to each proposed pathologic index**

|                  | No. of patterns | 1 <sup>st</sup> tertile |            |       |       | 2 <sup>nd</sup> tertile |            |       |       | 3 <sup>rd</sup> tertile |            |            |       | P value |
|------------------|-----------------|-------------------------|------------|-------|-------|-------------------------|------------|-------|-------|-------------------------|------------|------------|-------|---------|
|                  |                 | 1                       | 2          | 3     | 4     | 1                       | 2          | 3     | 4     | 1                       | 2          | 3          | 4     |         |
| Pathologic Index | 1               | 30<br>(60)              | 20<br>(40) | 0 (0) | 0 (0) | 0 (0)                   | 46<br>(94) | 3 (6) | 0 (0) | 2 (4)                   | 29<br>(59) | 17<br>(35) | 1 (2) | <0.001  |
|                  | 2               | 30<br>(60)              | 19<br>(38) | 1 (2) | 0 (0) | 0 (0)                   | 45<br>(92) | 4 (8) | 0 (0) | 2 (4)                   | 31<br>(63) | 15<br>(31) | 1 (2) | <0.001  |
|                  | 3               | 13<br>(26)              | 37<br>(77) | 0 (0) | 0 (0) | 18 (37)                 | 27<br>(55) | 4 (8) | 0 (0) | 1 (2)                   | 31<br>(63) | 16<br>(33) | 1 (2) | <0.001  |
|                  | 4               | 32<br>(33)              | 65<br>(67) | 0 (0) | 0 (0) | 0 (0)                   | 4<br>(100) | 0 (0) | 0 (0) | 0 (0)                   | 26<br>(55) | 20<br>(43) | 1 (2) | <0.001  |

\*Numbers in parentheses are percentages.

**Supplementary Table S3: Distribution of the predominant subtype in each tertile group according to each proposed pathologic index.**

See Supplementary File 1
